# Supplementary material
Source: Springer Nature journal article supplement (https://www.springermedizin.de/resource/supplementary/12887_2005_86_MOESM3_ESM.pdf/9477230)

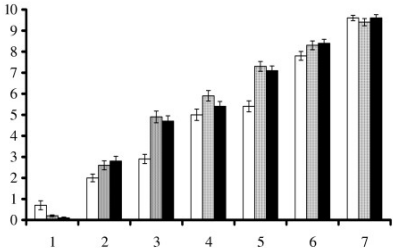

Supplement: MOESM3 [file 9477230]
